# Supplementary material for: Triboelectric behaviors of inorganic Cs1−xAxPbBr3 halide perovskites toward enriching the triboelectric series
Source: Royal Society of Chemistry journal article supplement (doi:10.1039/d0ta09982a), 2020-01-01
Supplement: d0ta09982a1.pdf [file d0ta09982a1.pdf]

## Supplementary Information

### **Triboelectrification Behaviors of Inorganic $\text{Cs}_{1-x}\text{A}_x\text{PbBr}_3$ Halide Perovskites toward Enriching Triboelectric Series**

Yudi Wang,<sup>a</sup> Xiya Yang,<sup>a,\*</sup> Wenkai Xu,<sup>a</sup> Xueping Yu,<sup>a</sup> Jialong Duan,<sup>a</sup> Yanyan  
Duan,<sup>b</sup> and Qunwei Tang<sup>a</sup>

<sup>a</sup> Institute of New Energy Technology, College of Information Science and  
Technology, Jinan University, Guangzhou 510632, PR China;

<sup>b</sup> State Centre for International Cooperation on Designer Low-Carbon and  
Environmental Material (SCICDLCEM), School of Materials Science and Engineering,  
Zhengzhou University, Zhengzhou 450001, PR China;

E-mail address: xiyayang@jnu.edu.cn

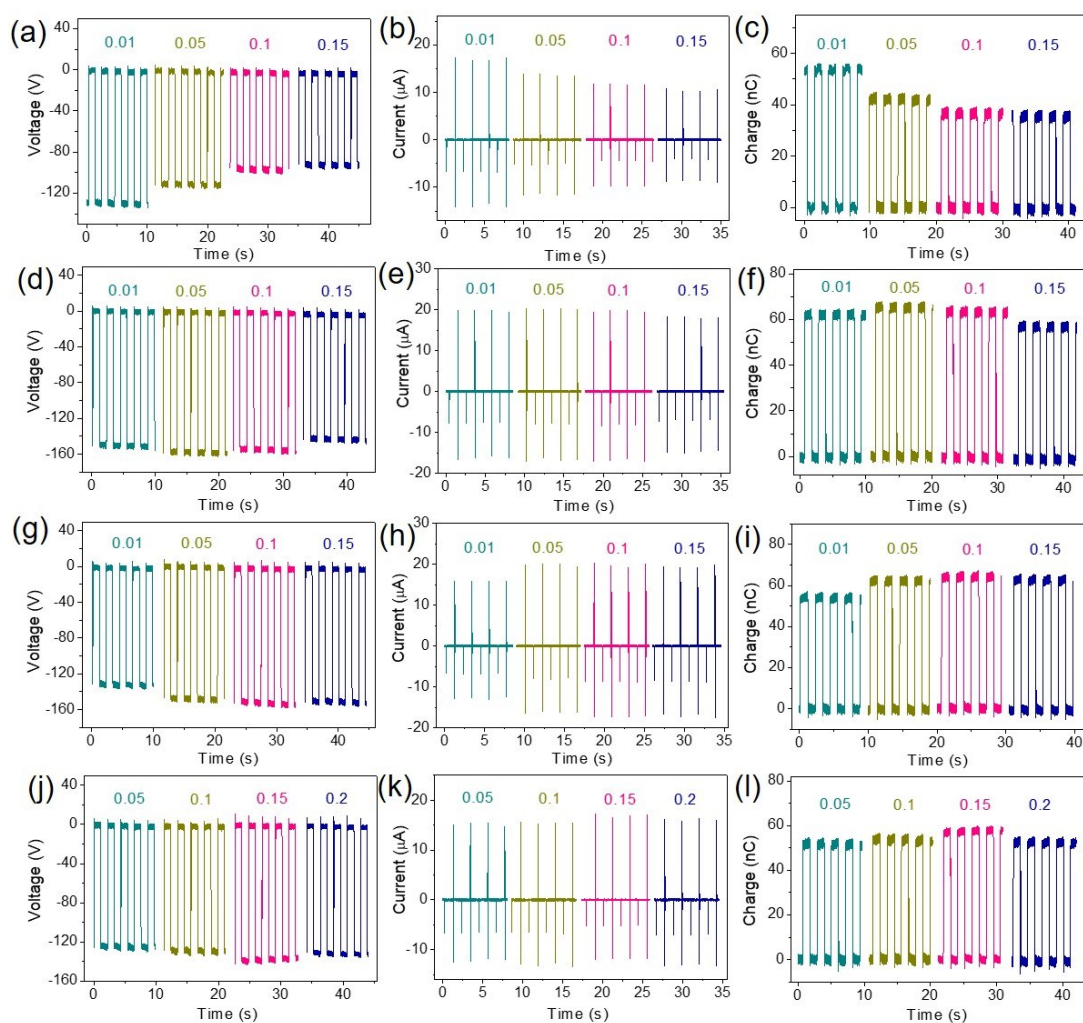

**Figure S1.** Triboelectric (a, d, g, j) voltage, (b, e, h, k) current, and (c, f, i, l) charge outputs of the perovskites doped with (a-c)  $\text{Li}^+$ , (d-f)  $\text{Na}^+$ , (g-i)  $\text{K}^+$ , and (j-l)  $\text{Rb}^+$  at various doping contents.

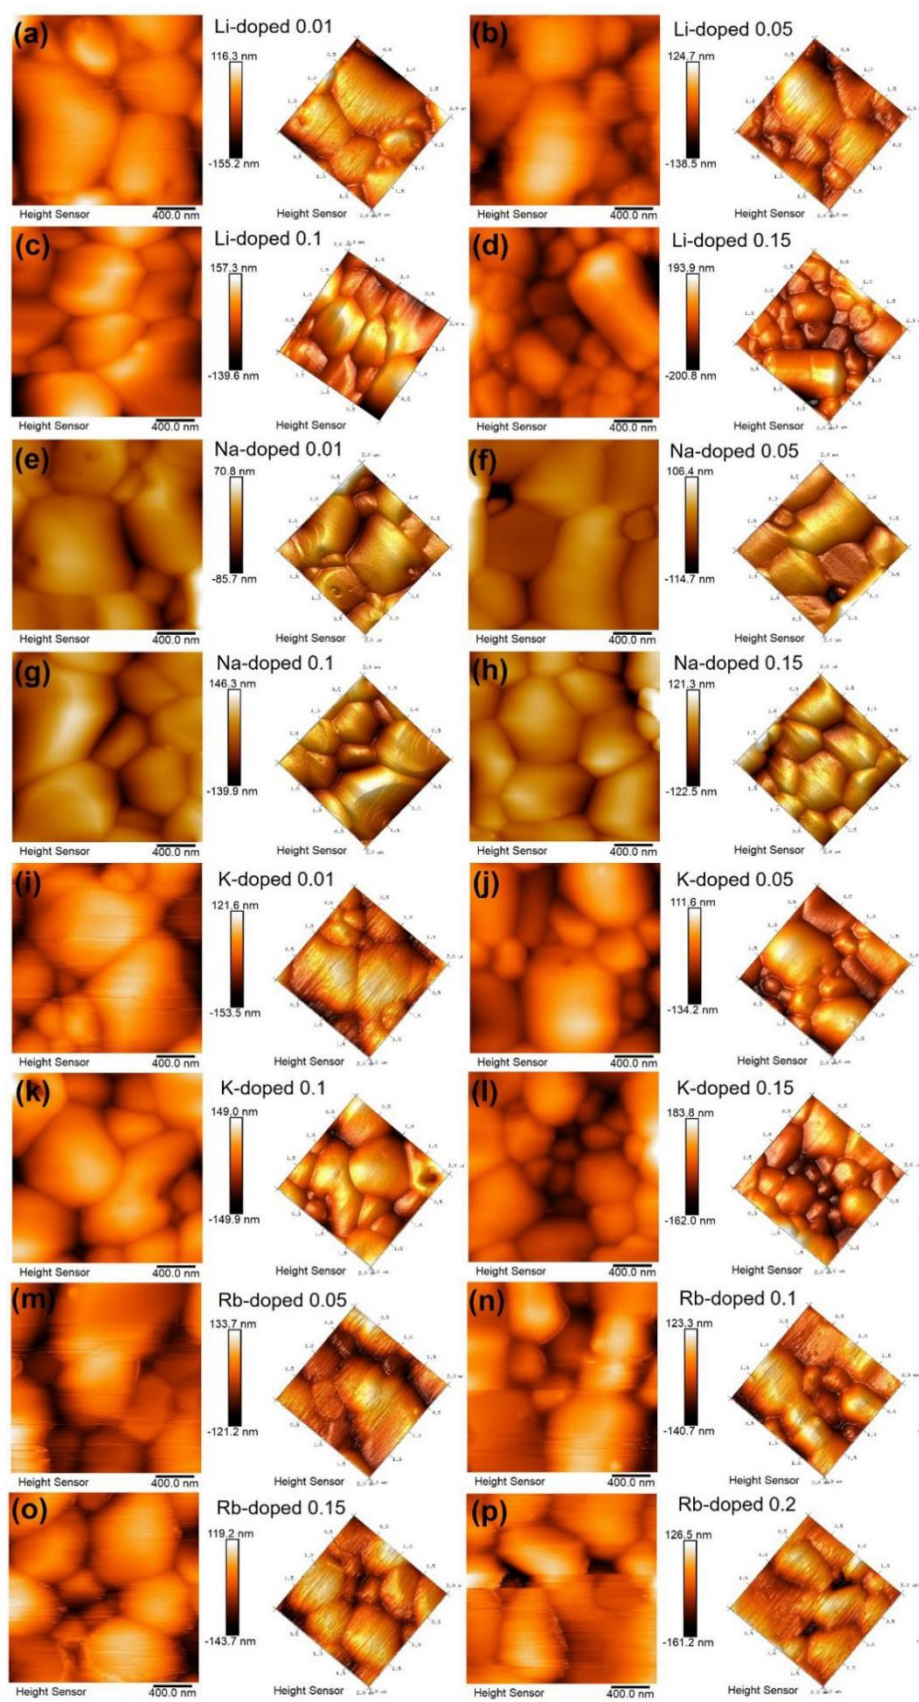

**Figure S2.** AFM characterizations of surface roughness of  $\text{Cs}_{1-x}\text{A}_x\text{PbBr}_3$  films with increased (a-d)  $\text{Li}^+$ , (e-h)  $\text{Na}^+$ , (i-l)  $\text{K}^+$ , (m-p)  $\text{Rb}^+$  doping contents.

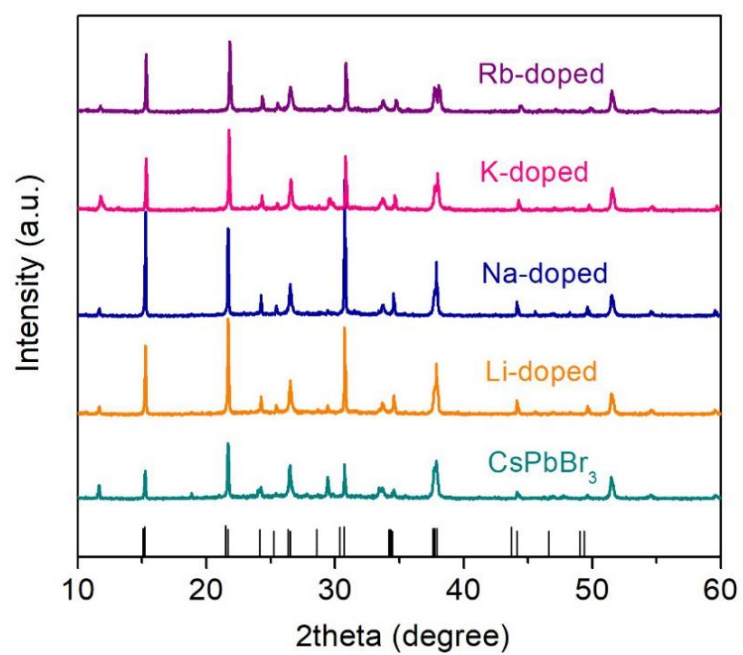

**Figure S3.** XRD patterns of pristine CsPbBr<sub>3</sub> and Cs<sub>1-x</sub>A<sub>x</sub>PbBr<sub>3</sub> perovskite films and the standard CsPbBr<sub>3</sub> perovskite lattice.

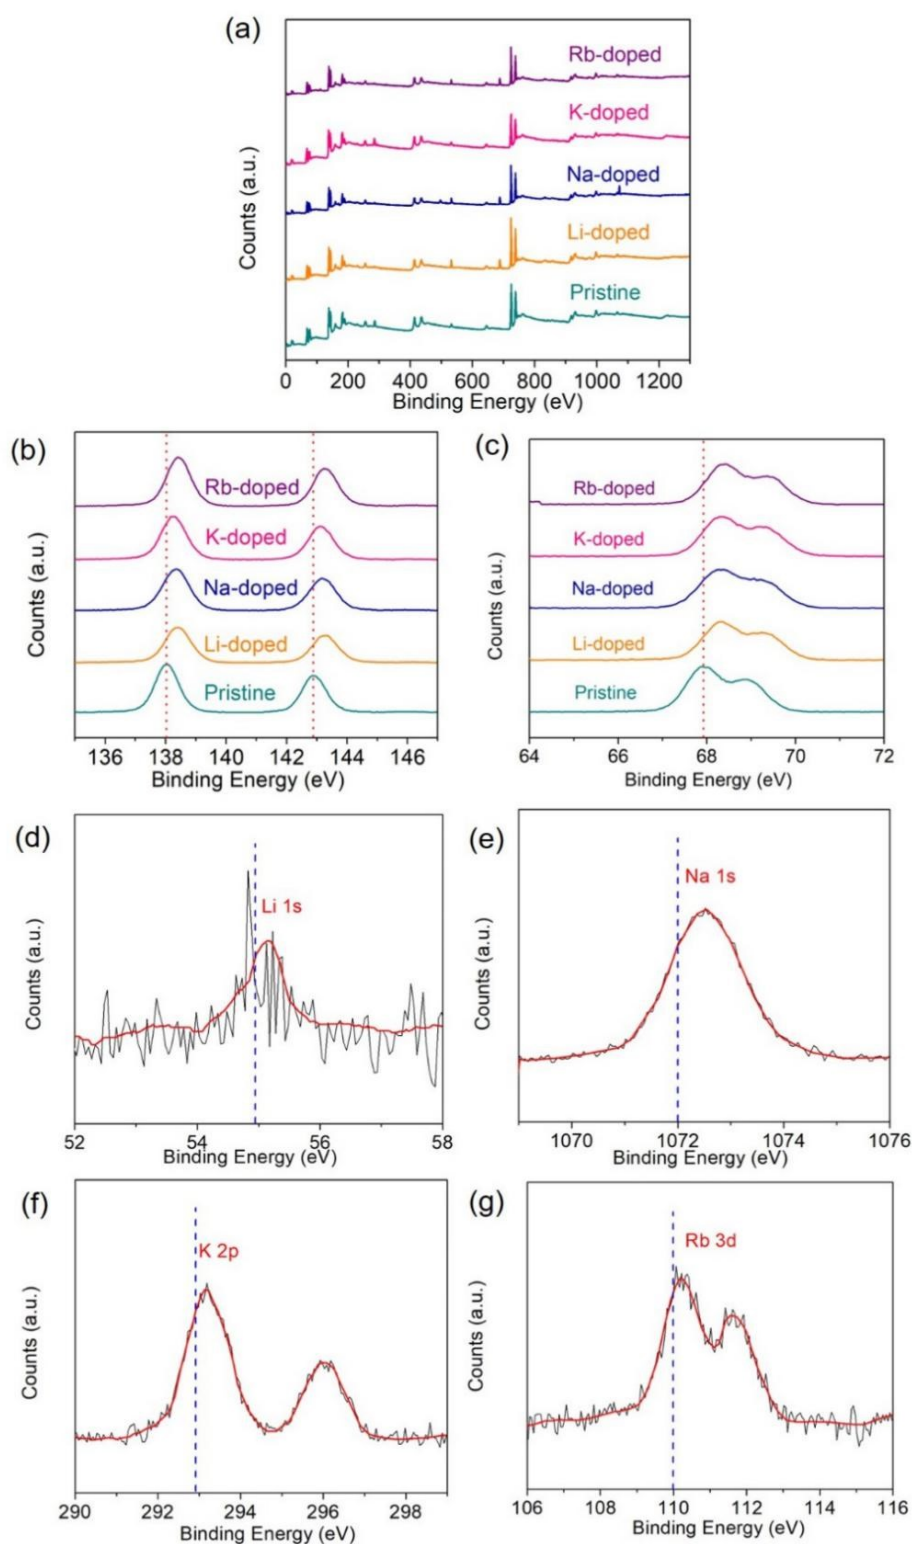

**Figure S4.** (a) High-resolution XPS spectra of pristine CsPbBr<sub>3</sub> and Cs<sub>1-x</sub>A<sub>x</sub>PbBr<sub>3</sub> perovskites. XPS spectra of (b) Pb 4f, (c) Br 3d, (d) Li 1s, (e) Na 1s, (f) K 2p, (g) Rb 3d. (d-g) The blue dash lines exhibit the standard electron binding energies of corresponding alkali metal ions.

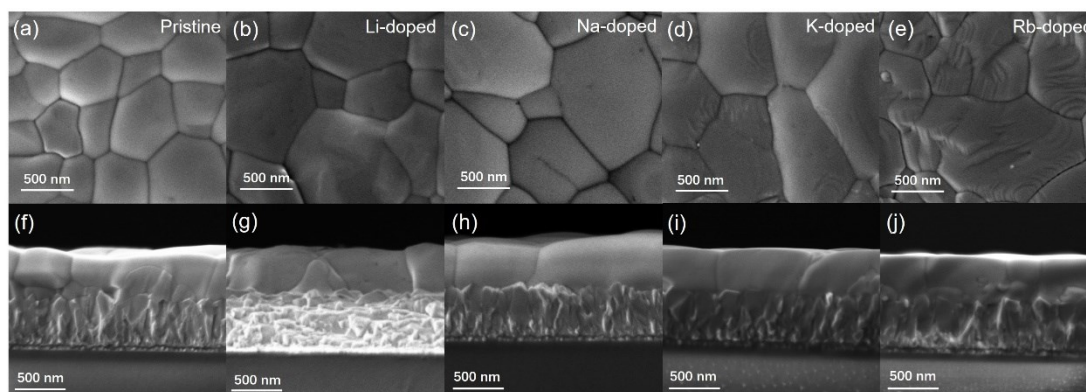

**Figure S5.** Morphological characteristics of pristine  $\text{CsPbBr}_3$  and  $\text{Cs}_{1-x}\text{A}_x\text{PbBr}_3$  perovskite films. (a-e) Top-view and (f-j) cross-section SEM images of (a,f) pristine  $\text{CsPbBr}_3$  and the perovskite doped with (b, g)  $\text{Li}^+$ , (c, h)  $\text{Na}^+$ , (d, i)  $\text{K}^+$ , (e, j)  $\text{Rb}^+$  ions with optimal doping concentrations, respectively.

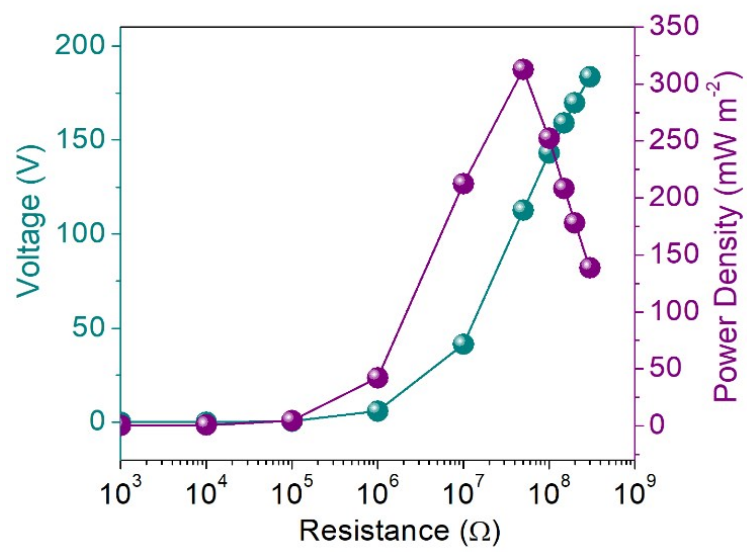

**Figure S6.** Voltage and power density outputs of FTO/CsPbBr<sub>3</sub>-PVDF/Ag TENG at various external load resistances.

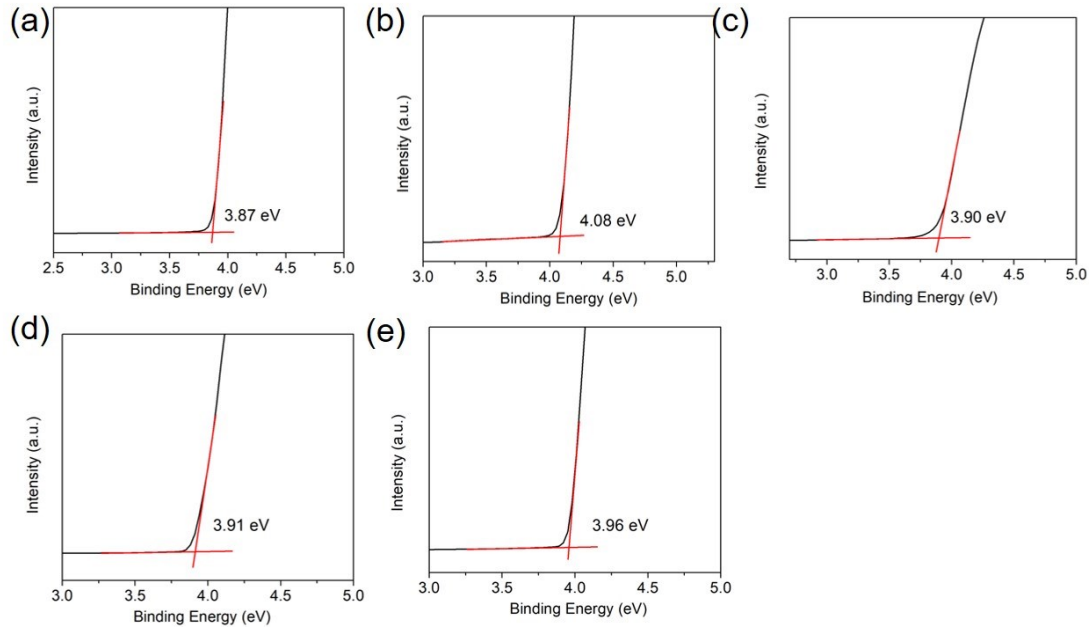

**Figure S7.** The ultraviolet photoelectron spectroscopy (UPS) spectra of (a) CsPbBr<sub>3</sub>, (b) Cs<sub>0.99</sub>Li<sub>0.01</sub>PbBr<sub>3</sub>, (c) Cs<sub>0.95</sub>Na<sub>0.05</sub>PbBr<sub>3</sub>, (d) Cs<sub>0.90</sub>K<sub>0.10</sub>PbBr<sub>3</sub>, (e)Cs<sub>0.85</sub>Rb<sub>0.15</sub>PbBr<sub>3</sub> perovskite films.

Theoretically, the work function can be calculated from UPS spectra according to the following equation:  $W_F = h\nu + E_{\text{cutoff}} - E_{\text{Fermi}}$ , where  $h\nu$  is the exciting source and accurate,  $E_{\text{Fermi}}$  is also easy to demarcate from the differential of Fermi edge (Surf. Interface Anal. 26 (1998) 642-649).  $E_{\text{cutoff}}$  is relatively difficult to accurately demarcate due to the formation mechanism of the cutoff edge of secondary electron. Therefore, the fit error of  $W_F$  is mainly stemmed from the fit error of  $E_{\text{cutoff}}$ , which can be diminished within  $\pm 0.01\text{eV}$  to the great extent (Phys. Examination Test. 25 (2007) 21-23), and thus we give the error bar of  $\pm 0.01\text{eV}$ .

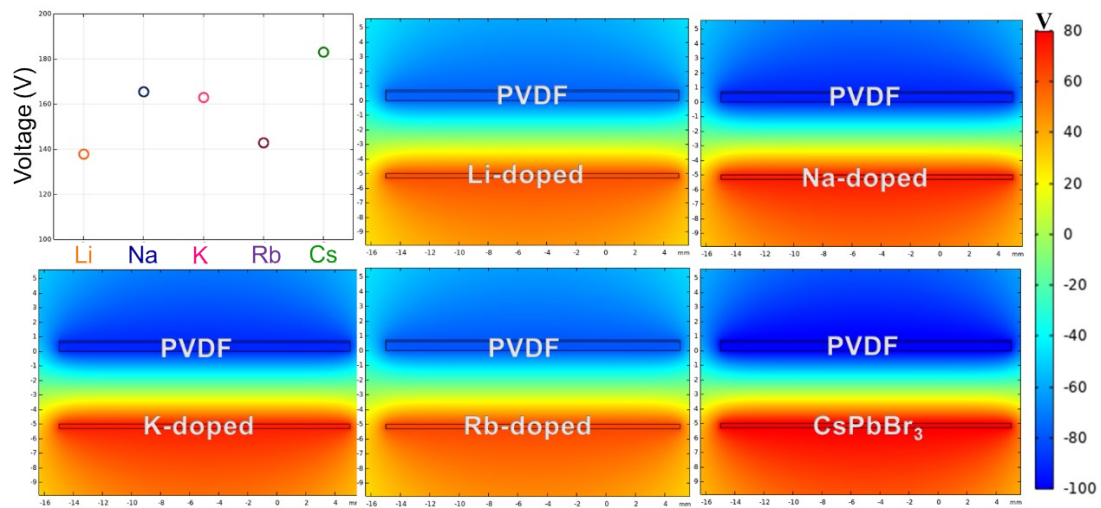

**Figure S8.** Simulated results of output potential difference between various Cs<sub>1-x</sub>A<sub>x</sub>PbBr<sub>3</sub> perovskites with optimal doping contents and their electrical potential distribution.

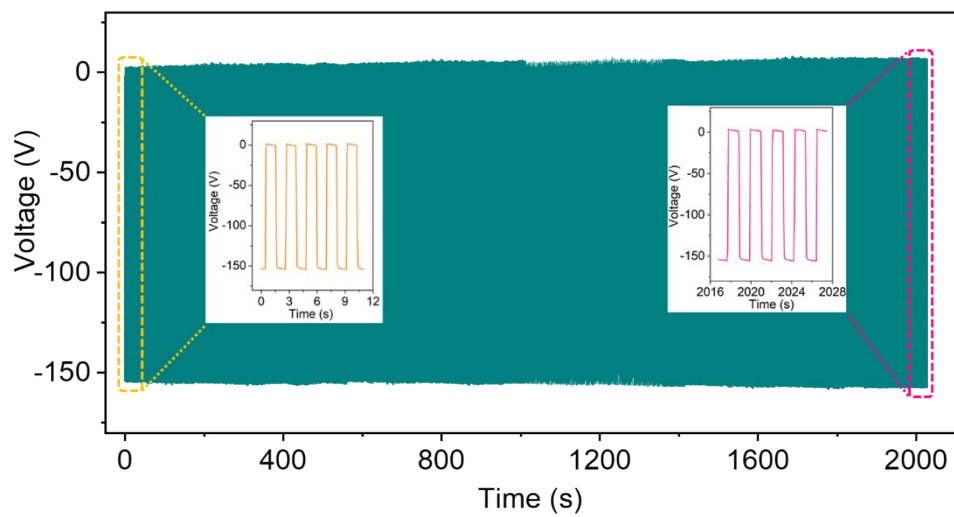

**Figure S9.** Durability test of the  $\text{Cs}_{0.95}\text{Na}_{0.05}\text{PbBr}_3$ -PVDF TENG over 1000 cycles at ambient atmosphere.

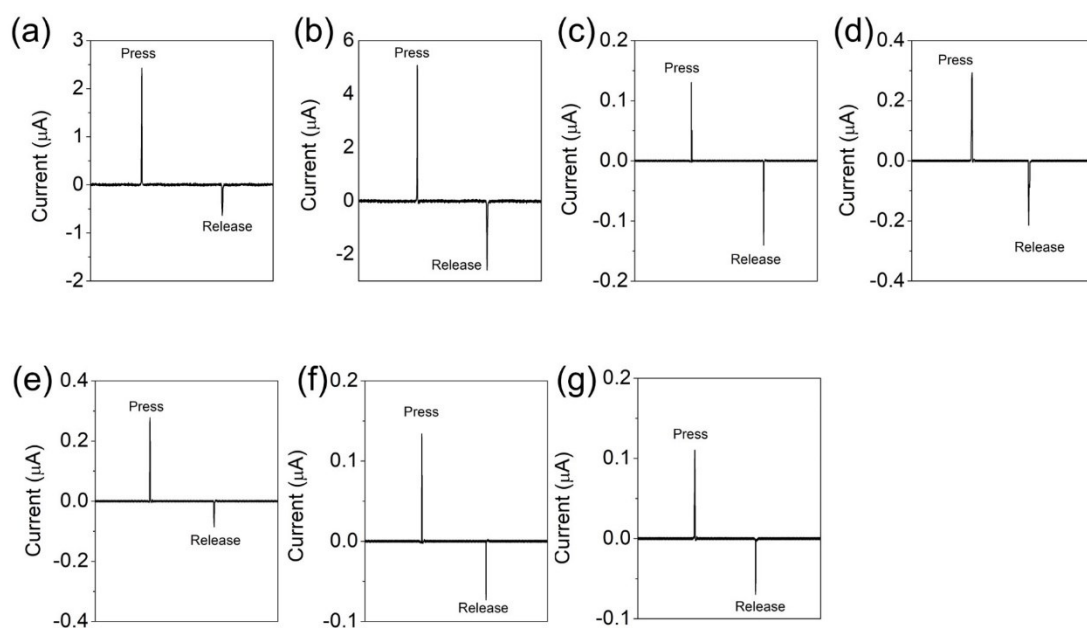

**Figure S10.** Triboelectric behaviors of the selected polymers. Triboelectric current signals of TENGs with (a) top PTFE-bottom PVDF, (b) top PVDF-bottom PDMS, (c) top PDMS-bottom PE, (d) top PE-bottom PC, (e) top PC-bottom PET, (f) top PET-bottom PI, and (g) top PI-bottom nylon pairs. Positive and negative signals obtained upon pressing or releasing indicate the larger electron affinity of the top polymer than the bottom one.

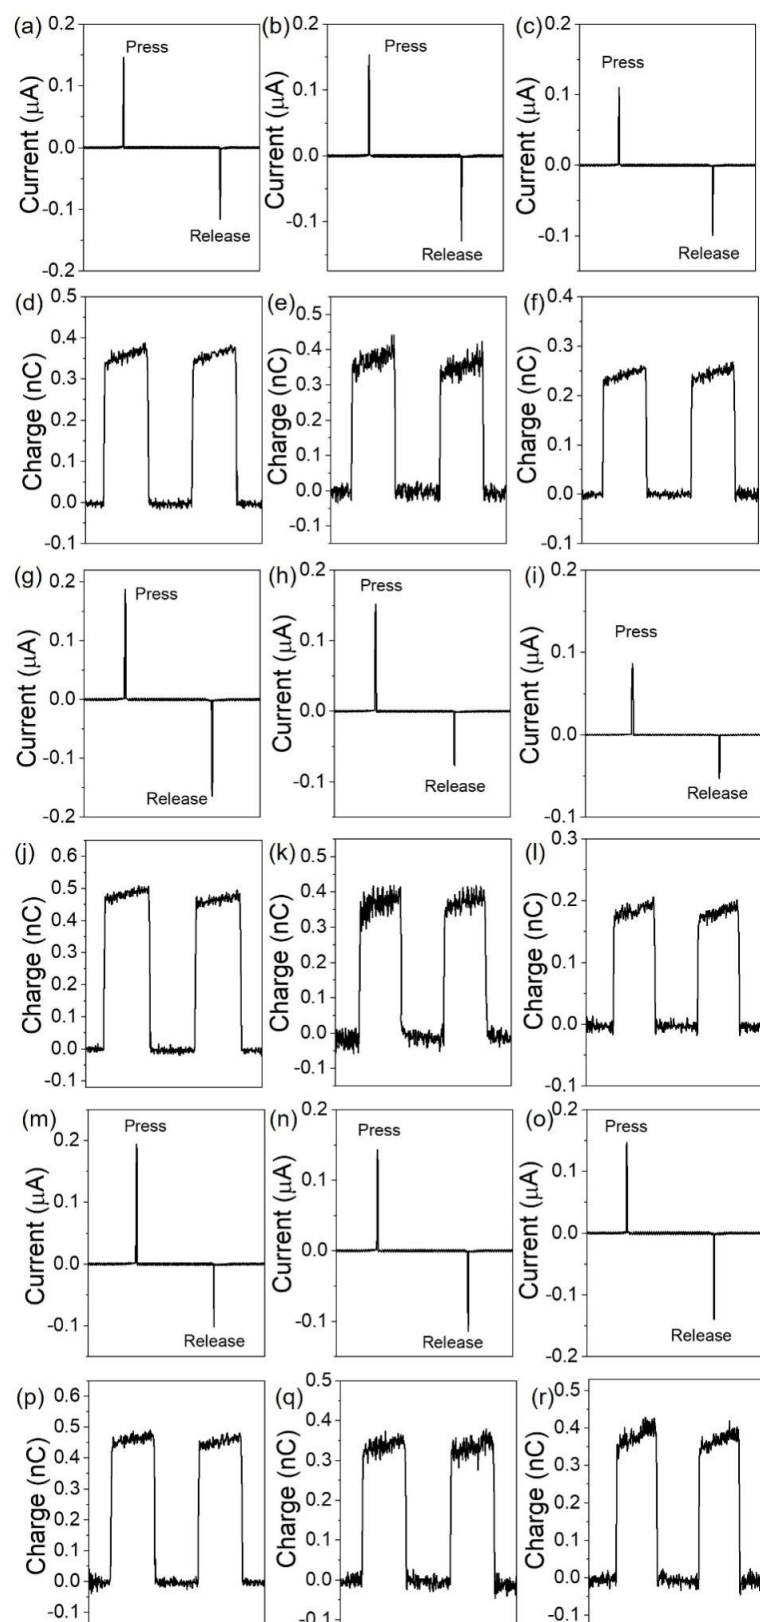

**Figure S11.** Triboelectrification behaviors of the  $\text{Cs}_{1-x}\text{A}_x\text{PbBr}_3$  perovskites with (a-f) the second, (g-l) the third, (m-r) the forth doping contents. Triboelectric current and

transferred charge signals of TENGs with (a,d,g,j,m,p) top Li doped-bottom Rb doped, (b,e,h,k,n,q) top Rb doped-bottom K doped, (c,f,i,l,o,r) top K doped-bottom Na doped pairs. Positive and negative signals were obtained upon pressing and releasing motions, indicating the larger electron affinity (more negative) of the top perovskite than the bottom one.

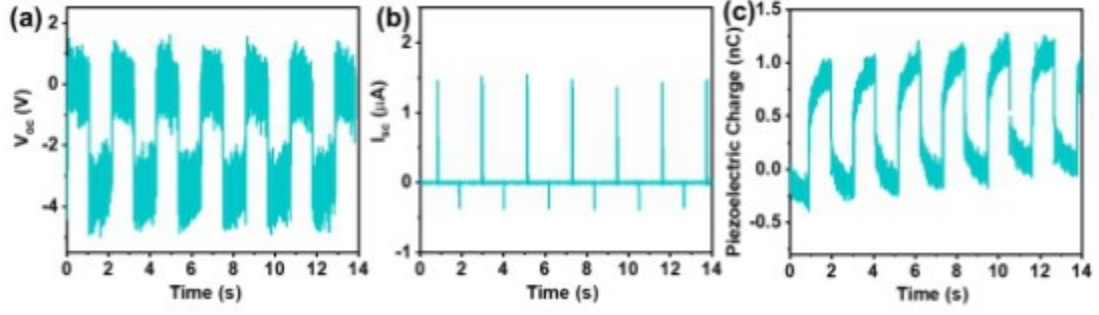

**Figure S12.** Piezoelectric behaviors of the FTO-PVDF/Ag device via keeping the contact status of the two counterparts.

Piezoelectric output with  $V_{oc}$  of 3 V,  $I_{sc}$  of 1.5  $\mu\text{A}$ , and  $Q_{sc}$  of 1 nC are obtained for FTO/PVDF/Ag device. The low piezoelectric signals indicate little effect of piezoelectric polarization of PVDF on triboelectric output performance.

**Table S1** Root mean square values of Cs<sub>1-x</sub>A<sub>x</sub>PbBr<sub>3</sub> films with various doping ions.

| RMS* (nm)<br>Doping<br>concentration | Li <sup>+</sup> | Na <sup>+</sup> | K <sup>+</sup> | Rb <sup>+</sup> |
|--------------------------------------|-----------------|-----------------|----------------|-----------------|
| <b>0.01</b>                          | 38.6            | 31.5            | 40.1           | NA              |
| <b>0.05</b>                          | 38.9            | 35.7            | 40.6           | 38.8            |
| <b>0.1</b>                           | 41              | 37.1            | 48             | 41.2            |
| <b>0.15</b>                          | 59.3            | 39.3            | 49             | 41.5            |
| <b>0.2</b>                           | NA              | NA              | NA             | 42.9            |
| *Root mean square (RMS)              |                 |                 |                |                 |

**Table S2** Summarized triboelectric charge density of the alkali metal ions, alkaline earth ions dopants and halogen regulation of perovskite TENGs.

| Perovskite                                                | $V_{oc}$ (V) | $E_m^*(\mu J)$<br>( $R_{ex}=50M\Omega$ ) | $\sigma(nC/m^2)^{**}$ | Ref.      |
|-----------------------------------------------------------|--------------|------------------------------------------|-----------------------|-----------|
| <b>CsPbBr<sub>3</sub></b>                                 | 182          | 13.6                                     | 322.14                | This work |
| <b>Cs<sub>0.99</sub>Li<sub>0.01</sub>PbBr<sub>3</sub></b> | 128          | 8.5                                      | 226.56                | This work |
| <b>Cs<sub>0.85</sub>Rb<sub>0.15</sub>PbBr<sub>3</sub></b> | 135          | 9.5                                      | 238.95                | This work |
| <b>Cs<sub>0.90</sub>K<sub>0.10</sub>PbBr<sub>3</sub></b>  | 152          | 11.4                                     | 269.04                | This work |
| <b>Cs<sub>0.95</sub>Na<sub>0.05</sub>PbBr<sub>3</sub></b> | 158          | 12.4                                     | 279.66                | This work |
| <b>CsPb<sub>0.93</sub>Sr<sub>0.07</sub>Br<sub>3</sub></b> | 127          | 7.8                                      | 224.79                | [1]       |
| <b>CsPb<sub>0.97</sub>Ca<sub>0.03</sub>Br<sub>3</sub></b> | 138          | 8.5                                      | 244.26                | [1]       |
| <b>CsPb<sub>0.99</sub>Mg<sub>0.01</sub>Br<sub>3</sub></b> | 142          | 11.1                                     | 251.34                | [1]       |
| <b>CsPb<sub>0.91</sub>Ba<sub>0.09</sub>Br<sub>3</sub></b> | 222          | 15.9                                     | 392.94                | [1]       |
| <b>CsPbCl<sub>3</sub></b>                                 | 257          | 16.53                                    | 454.89                | [2]       |
| <b>CsPbI<sub>2</sub>Br</b>                                | 225          | 14.5                                     | 398.25                | [2]       |

\* $E_m$ : Maximum possible output energy per “press-release” cycle

\*\*  $\sigma$ : Surface triboelectric charge density, calculated by  $V_{oc} = \sigma x / \epsilon_0$

## References

- [1] Y. Wang, X. Yang, X. Yu, J. Duan, Q. Yang, Y Duan, Q. Tang, *Nano Energy*, 2020, **77**, 105280.
- [2] X. Yu, Y. Wang, J. Zhang, J. Duan, X. Yang, L. Liu, Q. Tang, *J. Mater. Chem. A*, 2020, **8**, 4299.
